# Supplementary material
Source: MDPI journal article supplement (https://www.mdpi.com/1996-1073/16/13/5018)
Supplement: s1 [file s1]

## **Comparison of hydrogen production efficiency by *Rhodopseudomonas palustris* MP3 and *Rhodopseudomonas harwoodiae* SP6 using an iron complex as an enhancement factor**

Fariha Kanwal<sup>1, 2, 3, 9</sup>, Arifa Tahir<sup>1</sup>, Takuya Tsuzuki<sup>3</sup>, David Nisbet<sup>4, 5, 6, 7</sup>, Junhong Chen<sup>8</sup>, Angel, A. J Torriero<sup>9\*</sup>

1. *Environmental Science Department, Lahore College for Women University, Pakistan*
2. *Department of Microbiology and Molecular Genetics, University of the Punjab, Pakistan*
3. *School of Engineering, Australian National University, Australia*
4. *The Graeme Clark Institute, The University of Melbourne, Melbourne, Australia*
5. *Department of Biomedical Engineering, Faculty of Engineering and Information Technology, The University of Melbourne, Melbourne, Australia.*
6. *Aikenhead Centre for Medical Discovery, St Vincent's Hospital Melbourne, Melbourne, Victoria 3065, Australia*
7. *The Medical School, Faculty of Medicine, Dentistry and Health Science, The University of Melbourne, Melbourne, Australia.*
8. *Geoscience Australia, PO Box 378, ACT 2601, Australia.*
9. *School of Life and Environmental Sciences, Faculty of Science Engineering & Built Environment, Deakin University, Burwood, VIC 3125, Australia*

\* Correspondence: [angel.torriero@deakin.edu.au](mailto:angel.torriero@deakin.edu.au); Tel.: +61-3-9244-6897

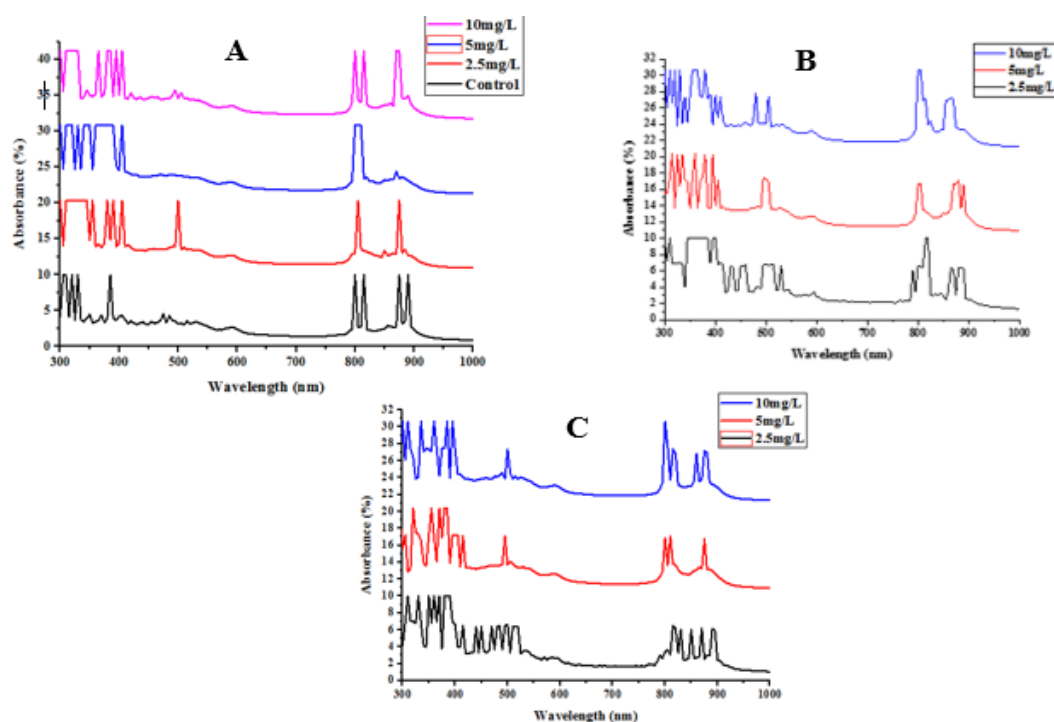

**Figure S1.** UV-Vis spectra showing the effect of  $\text{FeSO}_4 \cdot 7\text{H}_2\text{O}$  (A) and Fe-NO complex (B & C) on bacteriochlorophyll produced by *R. palustris* MP3.

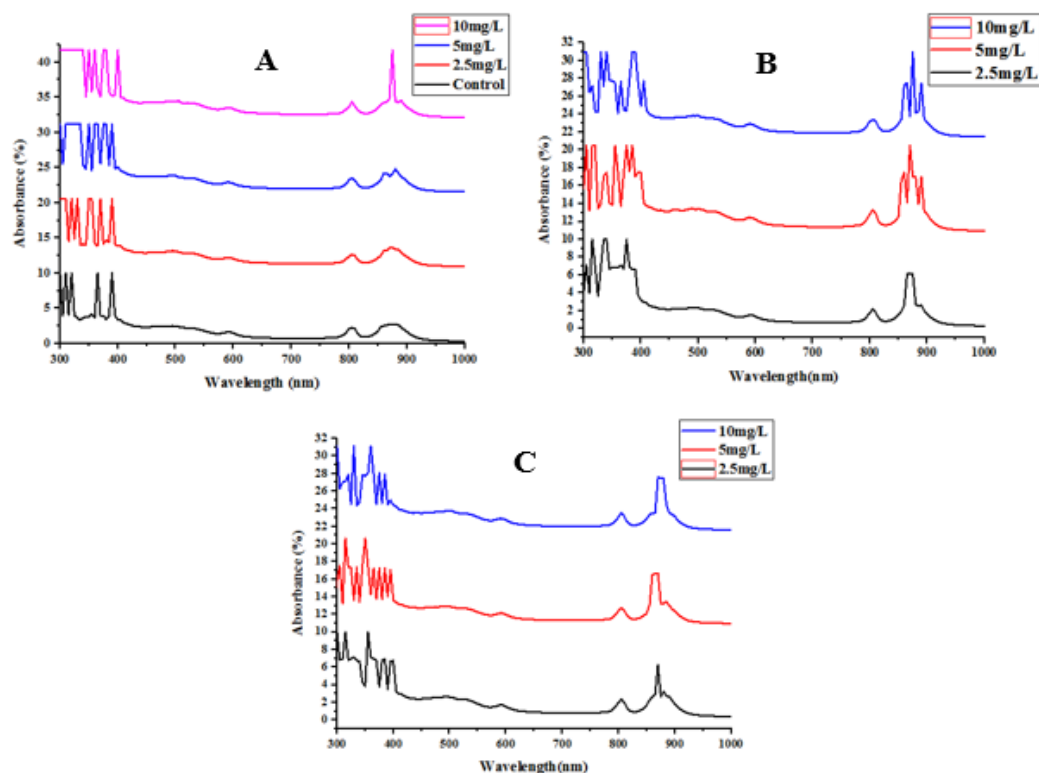

**Figure S2.** UV-Vis spectrum showing the effect of  $\text{FeSO}_4 \cdot 7\text{H}_2\text{O}$  (A) and Fe-NO complex (B & C) on bacteriochlorophyll produced by *R. harwoodiae* SP6.
